# Supplementary material for: Relationship between Health Status and Daily Activities Based on Housing Type among Suburban Residents during COVID-19 Self-Isolation
Source: MDPI journal article supplement (doi:10.3390/ijerph20032639), 2023-02-01

## Supplementary material

### **A. Let me ask you about yourself.**

#### **A1 Please indicate your gender and age. (circle one for each).**

【Gender】 1. Male                      2. Female

【Age】    1. 20~29                      2. 30~39                      3. 40~49                      4. 50~59  
              5. 60~64                      6. 65~69                      7. 70~79                      8. Over 80

#### **A2 Please answer the following questions about your occupation. (circle one)**

- |                                         |                                   |                             |
|-----------------------------------------|-----------------------------------|-----------------------------|
| 1. Company employees and civil servants | 2. Self-employed profession       | 3. Agriculture and forestry |
| 4. Household chores                     | 5. Students                       | 6. Part-time job            |
| 7. Fixed year retirees                  | 8. Other (                      ) |                             |

#### **A3 Please indicate in the answer the neighborhood association where you live.**

Teraichidai, Tondabayashi City

|       |
|-------|
| chome |
|-------|

#### **A5 Please describe your family structure. (circle one)**

- |                                |                                   |                              |
|--------------------------------|-----------------------------------|------------------------------|
| 1. Living alone                | 2. Couple                         | 3. Nuclear family households |
| 4. Three-generation households | 5. Other (                      ) |                              |

#### **A6 Please answer the following questions about your residence. (circle one)**

- |                   |              |
|-------------------|--------------|
| 1. Detached house | 2. Apartment |
|-------------------|--------------|

**B We would like to ask you a few questions about your daily activities.**

\*Looking back over the past week, please answer the following questions about your typical day.

B1 How long do you perform the activities of daily living? (circle one for each)

|                                    | I don't | Less than 1<br>hour | 1~3<br>hours | 4~6<br>hours | Over 6<br>hours |
|------------------------------------|---------|---------------------|--------------|--------------|-----------------|
| 1 Patrolling                       |         |                     |              |              |                 |
| 2 Meals                            |         |                     |              |              |                 |
| 3 Commuting to work and school     |         |                     |              |              |                 |
| 4 Work                             |         |                     |              |              |                 |
| 5 Study                            |         |                     |              |              |                 |
| 6 Housework                        |         |                     |              |              |                 |
| 7 Care and nursing                 |         |                     |              |              |                 |
| 8 Childcare                        |         |                     |              |              |                 |
| 9 Shopping                         |         |                     |              |              |                 |
| 10 Moving                          |         |                     |              |              |                 |
| 11 Television                      |         |                     |              |              |                 |
| 12 Rest                            |         |                     |              |              |                 |
| 13 Personal development            |         |                     |              |              |                 |
| 14 Recreational hobbies            |         |                     |              |              |                 |
| 15 Sports                          |         |                     |              |              |                 |
| 16 Social participation activities |         |                     |              |              |                 |
| 17 Exchange socializing            |         |                     |              |              |                 |
| 18 Medical treatment               |         |                     |              |              |                 |
| 19 Sleep                           |         |                     |              |              |                 |

**C We would like to ask you about your health.**

\*We ask about your daily health over the past week. Please answer the questions with your first impression. (circle one for each)

C1. In general, would you say your health is ?

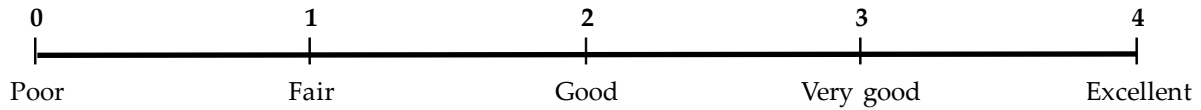

C2. Moderate activities, such as moving a table, pushing a vacuum cleaner, bowling, or playing golf ?

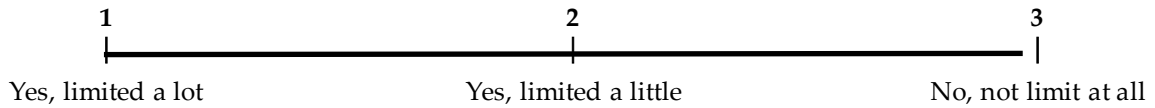

C3. Climbing several flights of stairs ?

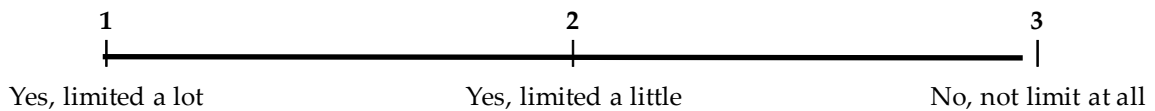

C4. Accomplished less than you would like ?

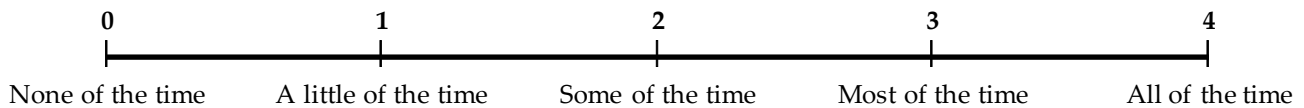

C5. Were limited in the kind of work or other activities ?

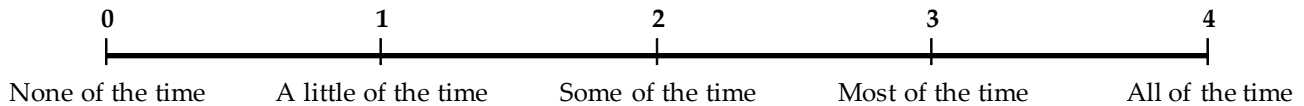

C6. Accomplished less than you would like ?

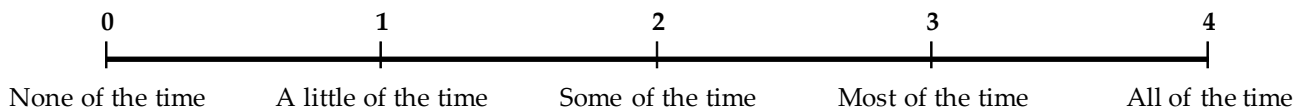

C7. Did work or other activities less carefully than usual ?

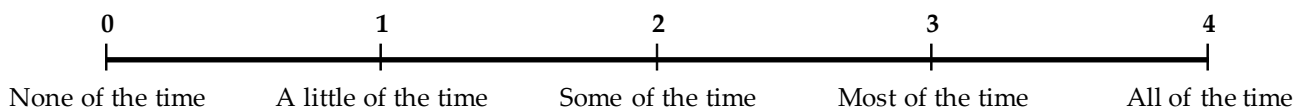

C8. During the past 4 weeks , how much did pain interfere with your normal work (including both work outside the home and housework)? ?

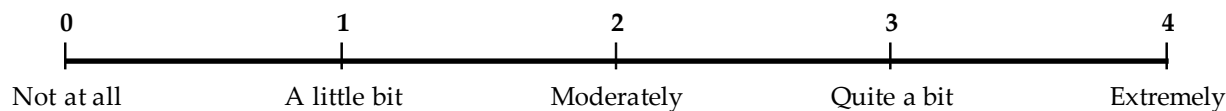

C9. Have you felt calm and peaceful? ?

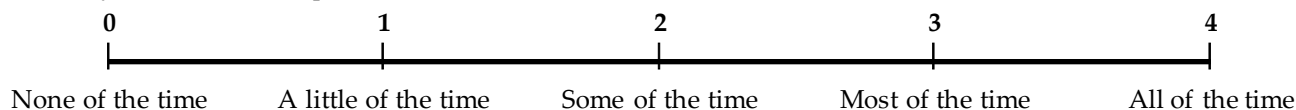

C10. Did you have a lot of energy? ?

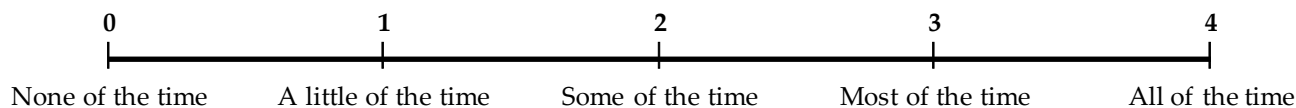

C11. Have you felt downhearted and depressed? ?

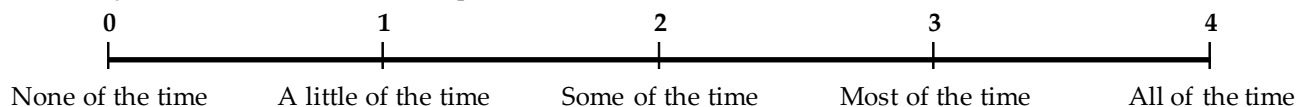

C12. During the past 4 weeks , how much of the time has your physical health or emotional problems interfered with your social activities (like visiting friends, relatives, etc.) ?

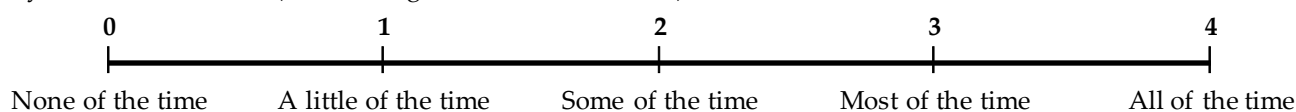

Supplement: s1 [file s1]
